# Supplementary material
Source: Springer Nature journal article supplement (https://www.springermedizin.de/resource/supplementary/12950_2013_296_MOESM1_ESM.pdf/9557496)

**A****Normoxia**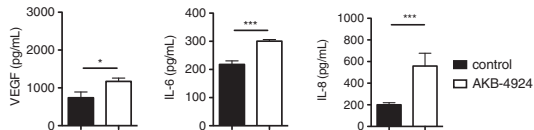**B****Hypoxia**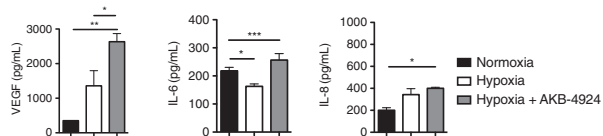**C****LPS**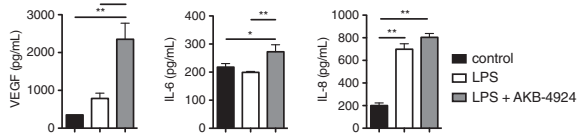**D****Hypoxia + LPS**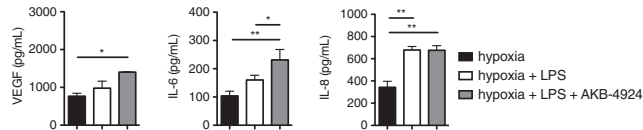

Supplement: MOESM1 [file 9557496]
